1  
2  
3  
4  
5  
6  
7  
8  
9  
10

# Simplitigs as an efficient and scalable representation of de Bruijn graphs

Karel Brinda<sup>1,2,\*</sup>, Michael Baym<sup>1</sup>, and Gregory Kucherov<sup>3,4</sup>

1 Department of Biomedical Informatics, Harvard Medical School, Boston, USA

2 Center for Communicable Disease Dynamic, Department of Epidemiology, Harvard T.H. Chan School of Public Health, Boston, USA

3 CNRS/LIGM Univ Gustave Eiffel, Marne-la-Vallée, France

4 Skolkovo Institute of Science and Technology, Moscow, Russia

\* Correspondence to [karel.brinda@hms.harvard.edu](mailto:karel.brinda@hms.harvard.edu)

11

## Abstract

12

### Motivation

13

14

15

16

17

### Results

18

19

20

21

22

23

24

25

### Availability

26

ProphAsm is written in C++ and is available under the MIT license from <http://github.com/prophyle/prophasm>.

27

## Introduction

28 Advances in DNA sequencing started the golden age of biology in which phenomena previously unobservable can  
29 be studied on an unprecedented scale. However, sequencing capacity has been growing faster than computer  
30 performance and memory, and also faster than available human resources. Nowadays large amounts of sequencing  
31 data are available, of a decreasing completeness and quality though. In consequence, traditional sequence-based  
32 representations and sequence alignment-based techniques [1–3] have become less suitable for real-life scenarios  
33 due to the space- and time-complexities they impose as well as due to their sequence-oriented nature in the age of  
34 datasets exhibiting graph structure.

35

36 An example is given by bacterial genomics. Modern large-scale studies of bacterial species comprise tens of  
37 thousands of sequenced isolates (see, e.g., [4–6]). However, information about isolates' genomes is almost always  
38 incomplete, as sequencing provides only partial observations of the genomes. While it is relatively straightforward  
39 to compute draft assemblies of bacterial genomes, completing the genomes is difficult. Due to repetitive regions, a  
40 full reconstruction from short reads is mathematically impossible even if the sequencing reads were error-free [7].  
41 Long reads are often unavailable and reference sequences are of limited applicability due to the high variability of  
42 bacteria and unclear borders between species. While draft assemblies may be sufficient for many analyses, they are  
43 often not an ideal universal representation for a multitude of reasons. Most importantly, draft assemblies created  
44 using different assemblers are not directly comparable and this can introduce false differential signals into studies  
45 [8–10]. In many scenarios it is therefore desirable to move data analysis closer to the sequencing technology and  
46 work with graph representations obtained directly from raw reads without assembling the genomes.

47

48 De Bruijn graphs belong to the most popular graph representations of genomic datasets. They are defined as  
49 directed graphs  $G = (V, E)$  where  $V$  is the set of all  $k$ -mers (i.e., substrings of a fixed length  $k$ ) occurring in the

50 dataset with edges connecting a vertex  $v$  to a vertex  $w$  if there is a  $k - 1$  long prefix-suffix overlap between  $v$  and  $w$ .  
51 As follows from the definition, a de Bruijn graph is defined by the underlying  $k$ -mer set and its edges can be  
52 defined implicitly (unlike the edge-centric definition where  $k$ -mer sets are associated with edges [11]). In this paper,  
53 we consider only vertex-centric graphs.

54

55 De Bruijn graphs feature remarkable properties. First, their computation from data is easy and deterministic.  
56 Algorithms for enumerating and counting  $k$ -mers have been extensively studied and many programs are available  
57 [12–15]. If the datasets contain sequencing errors, the computation may also involve graph cleaning. This aims at  
58 removing those  $k$ -mers that are the result of sequencing errors and, due to their supposed randomness, are expected  
59 to be rare. Second, if  $k$  is chosen appropriately, de Bruijn graphs can capture substantial information about the  
60 entire molecules under sequencing as these correspond to some walks in the graphs, provided that sequencing was  
61 sufficiently deep. Third, de Bruijn graphs can be handled easily, which simplifies software development as well as  
62 dataset analysis and interpretation. These properties have led to a large variety of applications of de Bruijn graphs.

63

64 De Bruijn graphs have been widely studied in the context of sequence assembly [16–18]. Here, their construction is  
65 typically the first step to the reconstruction of genomes and transcriptomes under sequencing from retrieved  
66 sequencing reads. Many modern assemblers (e.g., SPAdes [19], ABySS [20], Velvet [21], Minia [22], and  
67 MEGAHIT [23]) follow the de-Bruijn-graph paradigm.

68

69 Alignment-free sequence comparison [24] is another major application of de Bruijn graphs, following the idea that  
70 similar sequences share common  $k$ -mers, and comparing de Bruijn graphs thus provides a good measure of  
71 sequence or dataset similarity. This involves applications of de Bruijn graphs to variant calling and genotyping  
72 [25–29], transcript abundance estimation [30], and metagenomic classification [31–34]. The latter also  
73 demonstrates another particularity of de Bruijn graphs – their remarkable ability to approximate the graph structure  
74 of pan-genomes. Indeed, reference databases of bacterial strains are often highly incomplete and noisy;

75 nevertheless,  $k$ -mer-based classifiers perform best among all classifiers in inferring abundance profiles [35], which  
76 also suggests that de Bruijn graphs can be used to represent pan-genomes. Furthermore, de Bruijn graphs with a  
77 large  $k$ -mer size can be used for indexing variation graphs [36,37].

78

79 The importance of de Bruijn graphs leads us to a key problem: their space-efficient representation. While general  
80 de Bruijn graphs may impose large space requirements, it has been shown that those of real datasets can be highly  
81 compressible. Indeed, given the linearity of DNA and RNA molecules and the nature of sequencing, genomic  $k$ -mer  
82 datasets exhibit the so-called spectrum-like property: the existence of long strings of which most of the  $k$ -mers are  
83 substrings [11].

84

85 In this paper, we study the problem of representation of de Bruijn graphs for alignment-free data analysis. Building  
86 on previous works [38,39], we propose *simplitigs* as an effective representation of de Bruijn graphs. Simplitigs  
87 provide a “textual” representation of the graph, in the form of a set of sequences, representing each  $k$ -mer exactly  
88 once and facilitating easy indexing with standard full-text indexes. Simplitigs use the observation that in practical  
89 applications, such graphs typically contain long paths. In contrast to unitigs, which are the paths that do not contain  
90 any branching nodes, simplitigs can contain branching nodes.

91

92 Finally, we present ProphAsm, a tool for computing simplitigs for a given dataset, such as reads, genomes,  
93 pan-genomes or metagenomes. ProphAsm proceeds by building the associated de Bruijn graph in memory,  
94 followed by a greedy enumeration of maximal vertex-disjoint paths. We use ProphAsm to demonstrate that  
95 simplitigs are superior to unitigs both in terms of the cumulative sequence length and the number of sequences, and  
96 that they are sufficiently close to theoretical bounds in practical applications. The employed heuristic can be easily  
97 integrated into any software producing de Bruijn graphs.

98

## Results

99

### Simplitigs as an efficient representation of de Bruijn graphs

100 We developed the concept of simplitigs to efficiently represent de Bruijn graphs for alignment-free applications  
101 (**Figure 1**). Simplitigs are a generalization of unitigs and correspond to spellings of vertex-disjoint paths covering a  
102 given de Bruijn graph; consequently, maximal simplitigs are such simplitigs that cannot be further compacted by  
103 merging (Methods). Note that unitigs and  $k$ -mers are also simplitigs, but not maximal, in general. The main  
104 conceptual difference between maximal simplitigs and maximal unitigs is that unitigs are limited by branching  
105 nodes (which are crucial for genome assembly), whereas simplitigs are not limited by this constraint. This allows  
106 for further compactification, with a benefit increasing proportionally to the amount of branching nodes in the graph.

107

108 We designed a greedy heuristic for the computation of simplitigs (**Algorithm 1**, Methods). At every step, it selects  
109 a  $k$ -mer from the current  $k$ -mer set and keeps extending it forward and then backward as long as possible, while  
110 removing the already used  $k$ -mers from the set. This process is repeated until all  $k$ -mers are covered. We provide an  
111 implementation in a program called ProphAsm ([github.com/prophyle/prophasm](https://github.com/prophyle/prophasm)). The heuristic can be easily  
112 applied by any other software that outputs de Bruijn graphs or  $k$ -mer sets.

113

114 In the following sections, we use ProphAsm to compare maximal simplitigs with maximal unitigs on different types  
115 of data sets.

116

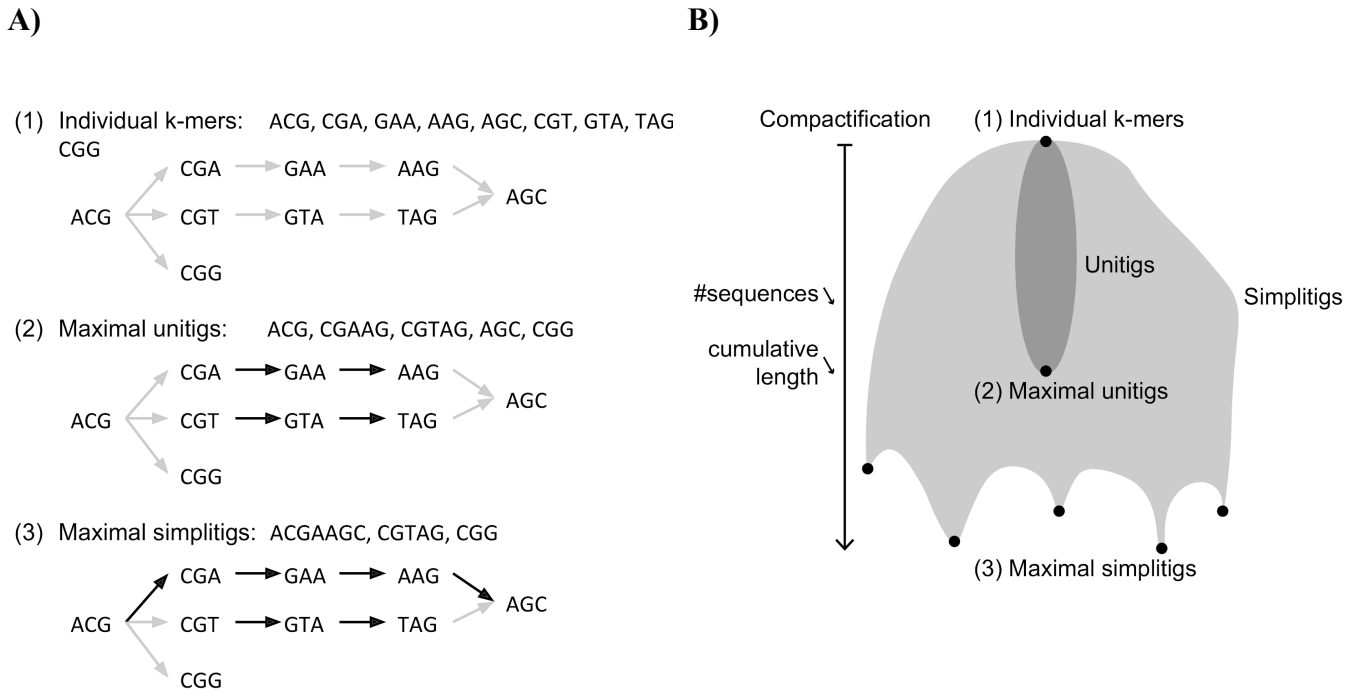

117 **Figure 1. Simplitigs vs. unitigs and uncompactified  $k$ -mers. A) Simplitig subgraphs of de Bruijn graphs**  
 118 **corresponding to individual kmers (1), maximal unitigs (2), and maximal simplitigs (3).** Every component of a  
 119 simplitig subgraph corresponds to a path and its spelling constitutes a simplitig (see Methods for more details).  
 120 **B) Scheme of different types of simplitig subgraphs with respect to the degree of compactification of the**  
 121  **$k$ -mer set.** While unitigs (the dark grey area) correspond to compactification along non-branching nodes in the  
 122 associated de Bruijn graph, simplitigs (the light and dark grey areas) can also contain branching nodes. When  
 123 starting with individual  $k$ -mers, every step of compactification decreases the number of sequences by 1 and the  
 124 cumulative length of sequences by  $k - 1$ . Unlike maximal unitigs, maximal simplitigs are not determined uniquely  
 125 and they may have even different cumulative lengths (corresponding to different local optima of compactification).

126 **Algorithm 1. Greedy computation of maximal simplitigs for a  $k$ -mer set.** In an iterative fashion, the algorithm  
127 draws a  $k$ -mer from the set of canonical  $k$ -mers  $K$ , uses it as a new simplitig, and then keeps extending the  
128 simplitig forwards and backwards as long as possible, while removing the already used canonical  $k$ -mers from  $K$ .

```
129 Function extend_simplitig_forward (K, simplitig):  
130     extending = True  
131     while extending:  
132         extending = False  
133         q = suffix (simplitig, k-1),  
134         for x in ['A', 'C', 'G', 'T']:  
135             can_kmer = canonical(q + x)  
136             if can_kmer in K:  
137                 extending = True  
138                 simplitig = simplitig + x  
139                 K.remove (can_kmer)  
140             break  
141     return K, simplitig  
142  
143 Function get_maximal_simplitig (K, initial_kmer):  
144     simplitig = initial_kmer  
145     K.remove (initial_kmer)  
146     K, simplitig = extend_simplitig_forward (K, simplitig)  
147     simplitig = reverse_completent (simplitig)  
148     K, simplitig = extend_simplitig_forward (K, simplitig)  
149     return K, simplitig  
150  
151 Function compute_simplitigs (kmers):  
152     K = {}  
153     for kmer in kmers:  
154         K.add (canonical(kmer))  
155     simplitigs = {}  
156     while |K| > 0:  
157         initial_kmer = K.pop ()  
158         K, simplitig = get_maximal_simplitig (K, initial_kmer)  
159         simplitigs.add (simplitig)  
160     return simplitigs
```



161

## Simplitigs of selected model organisms

162 We evaluated the simplitig representation on individual genomes of six model organisms for a range of  $k$ -mer  
163 lengths (**Figure 2**, Methods). Understanding the scaling based on the  $k$ -mer length is important for practical  
164 applications; the  $k$ -mer size is typically chosen with respect to the used sequencing technology and genomic  
165 diversity. The range for our experiments was selected based on values that are most commonly used for  
166 alignment-free sequence comparison (see, e.g., [30,31,40]). For each organism and a  $k$ -mer length, we computed  
167 maximal simplitigs and unitigs, and compared them in terms of two basic characteristics: the number of sequences  
168 produced and their cumulative length. Whereas the former defines the number of records to be kept, the latter  
169 determines the total memory needed. Note that the two numbers are tightly connected (Methods, (eq 1)).

170

171 First, we analyzed the number of sequences produced (**Figure 2**, upper plots). We observe that for all datasets, as  
172 the  $k$ -mer size increases, the number of simplitigs grows and then decreases slowly. The number of unitigs grows  
173 rapidly at the beginning, and subsequently drops substantially, approaching the number of simplitigs. The  
174 cumulative length (**Figure 2**, lower plots) is bounded from below by the number of  $k$ -mers in the genome plus  
175  $k - 1$ , corresponding to the theoretically maximum degree of compactification. In such a case, all  $k$ -mers would  
176 occur on the same simplitig; however, this is not attainable for most datasets. As we can observe and (eq 1)  
177 explains, the shapes of the curves in the lower plots copy the upper plots, while being only shifted up by a factor of  
178 the theoretical lower bound. When comparing the simplitig and unitig curves, we can observe the same patterns as  
179 for the number of sequences.

180

181

182

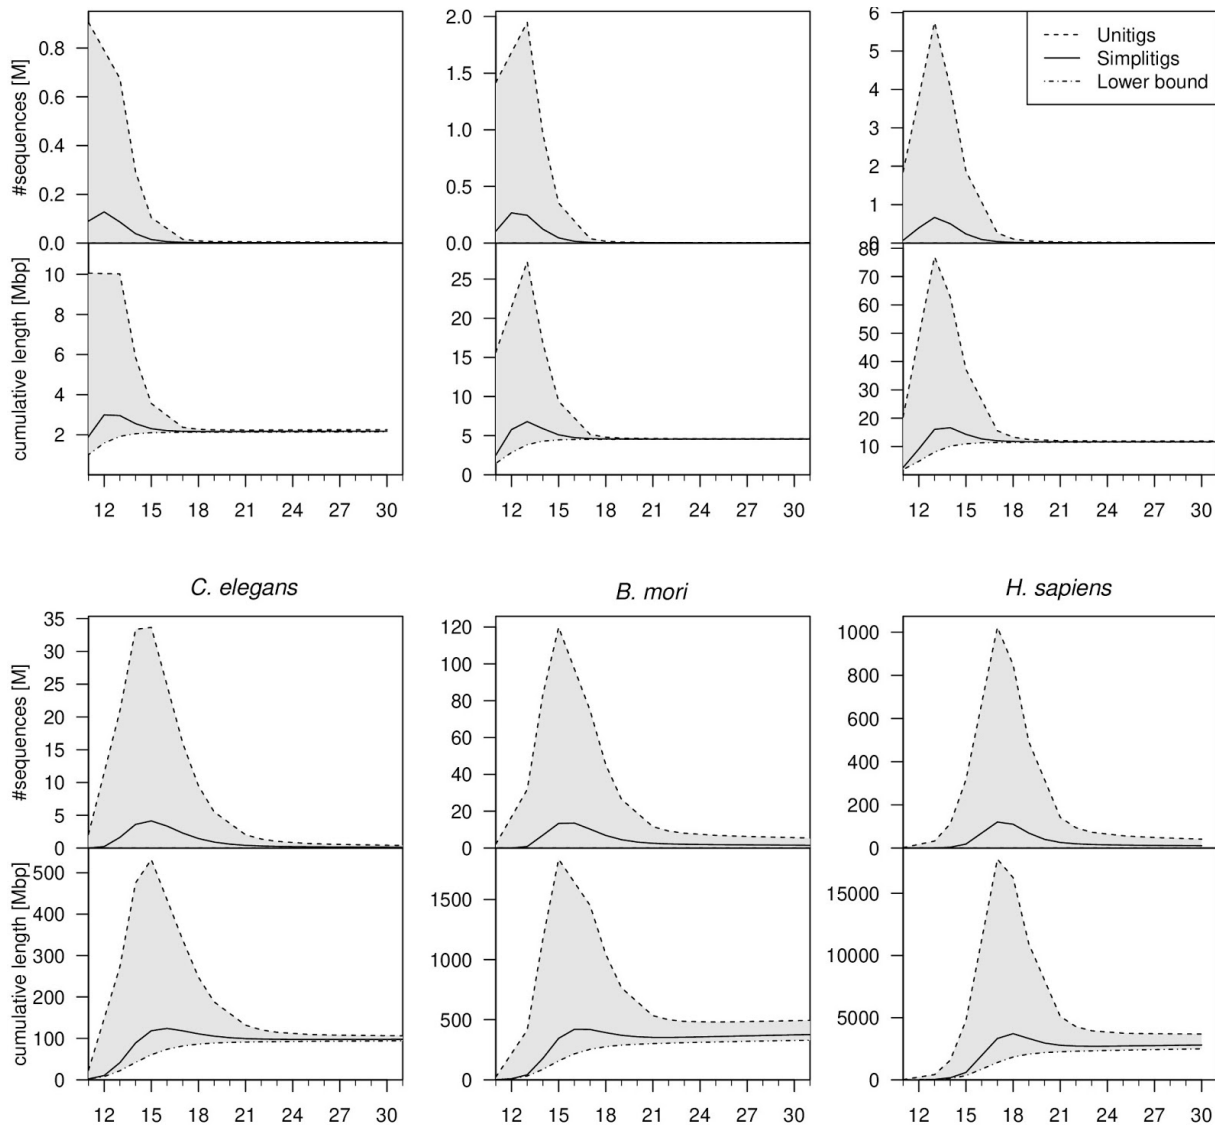

183 **Figure 2. Comparison of the simplitig and unitig representations for selected model organisms and a range of**  
 184 ***k*-mers.** The number of sequences and their cumulative length for representation obtained by ProphAsm, BCALM  
 185 2 and the theoretical lower bound for six model organisms ordered by their genome size: *S. pneumoniae* (2,22Mbp),  
 186 *Escherichia coli* (genome length: 4.64 Mbp), *Saccharomyces cerevisiae* (genome length: 12.2 Mbp),  
 187 *Caenorhabditis elegans* (genome length: 100 Mbp), *Bombyx mori* (genome length: 482 Mbp), and *Homo sapiens*  
 188 (genome length: 3.21 Gbp). The area highlighted in grey shows the discrepancy between the maximal unitigs and  
 189 the theoretical lower bound.

190

191 Note that the maxima of both functions occur at (or are very close to) the value  $k = \log_4 G$ , where  $G$  is the genome  
192 size. This is readily explained, as for values of  $k$  up to  $\log_4 G$ , an overwhelming fraction of all  $4^k$   $k$ -mers belong  
193 to the genome, which makes the de Bruijn graph branch at nearly every node. As a consequence, unitigs are  
194 essentially reduced to individual  $k$ -mers, and their number grows exponentially. Starting from  $k = \log_4 G$ , the  
195 number of  $k$ -mers is bounded by the genome length, and they begin to form longer non-branching paths in the  
196 graph, which drives down the number of unitigs. Importantly, however, the number of unitigs and their total size  
197 keep being much larger than those of simplitigs even for larger values of  $k$ , especially for large eukaryotic  
198 genomes.

199

200 Overall, we observed that simplitigs always provide better performance than unitigs. In particular, they quickly  
201 approach the theoretical lower bounds for both characteristics tested. Every data set has a range of  $k$ -mer lengths  
202 where the difference between simplitigs and unitigs is striking, and after a certain threshold, the difference almost  
203 vanishes. While for short genomes this threshold is located at smaller  $k$ -mer lengths than those typically used in  
204 alignment-free applications (e.g.,  $k \approx 17$  for *E. coli*), for long genomes this threshold has not been attained on the  
205 tested range and seems to be substantially shifted towards large  $k$ -mers (e.g., *B. mori*). All this suggests that in  
206 practical applications, simplitigs are preferable for indexing individual genomes and the benefit is likely to increase  
207 with the genome size.

208

209

## Simplitigs of bacterial pan-genomes

210 Computational pan-genomics has recently emerged as an important sub-branch of bioinformatics [41]. One of the  
211 motivations is the analysis of sequencing data in the context of whole species. Species are then represented using  
212 so-called pan-genome representations, i.e., reference structures including all within-species variation. De Bruijn  
213 graphs are particularly useful as pan-genomic references as they can be easily constructed from a variety of  
214 different data types, ranging from assembled reference sequences to the original sequencing reads. We sought to  
215 evaluate the usefulness of simplitigs for bacterial pan-genomes, which are particularly challenging due to their high  
216 diversity and variability.

217

218 We compared simplitig and unitig representations of the *Neisseria gonorrhoeae* pan-genome, as a function of the  
219 number of genomes included for the  $k$ -mer length 31 (**Figure 3**, Methods). We used 1,102 clinical isolates collected  
220 from 2000 to 2013 by the Centers for Disease Control and Prevention's Gonococcal Isolate Surveillance Project  
221 [42]; the data set comprises draft assemblies from Illumina HiSeq reads. As expected, as the number of isolates and  
222 the associated variance grow, the number of sequences and their cumulative length grow as well, both for maximal  
223 unitigs and simplitigs. While simplitigs and unitigs perform comparably well when one bacterial genome is  
224 included (consistent with **Figure 2**), the improvement of simplitigs over unitigs grows in the cumulative length as  
225 more genomes are included and eventually stabilizes at a factor of approximately 1.5 (**Figure 3**, bottom plot). On  
226 the other hand, the improvement in the number of sequences steadily decreases along the whole range and stabilizes  
227 at a factor of approximately 3.0.

228

229 To verify the generality of our findings, we repeated the experiment with the same dataset for the  $k$ -mer length 18  
230 and also with 616 pneumococcal genomes from a carriage study of children in Massachusetts [43,44] with the  
231  $k$ -mer lengths 18 and 31 (Methods). In all cases, the results were qualitatively the same, except for small changes in  
232 the resulting relative improvements.

233

234

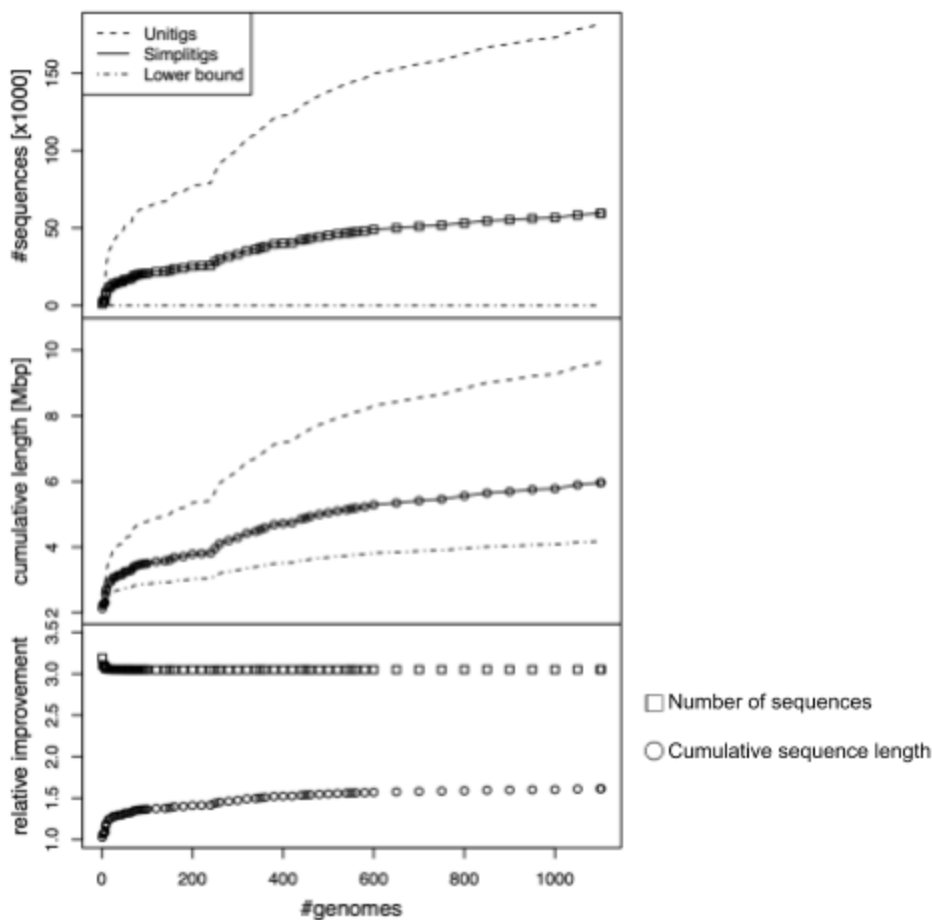

235

**Figure 3. Pan-genomic scaling of maximal simplitigs and maximal unitigs for *Neisseria gonorrhoeae* and  $k =$**

236

**31.** The first two plots show the number of sequences and their cumulative length as a function of the number of

237

genomes, respectively. Lower bounds correspond to a hypothetical perfect case with a single simplitig containing

238

all the  $k$ -mers. The third plot displays the relative improvement of simplitigs compared to unitigs.

239

240

## Application of simplitigs for $k$ -mer search in bacterial pan-genomes

241 Any sequence data can be searched for  $k$ -mers using full-text indexes. Importantly, the simplitig representation can  
242 accelerate the  $k$ -mer lookup in datasets with redundant  $k$ -mer content by removing these redundancies, which we  
243 show on the example of  $k$ -mer look up in bacterial pan-genomes.

244

245 The most popular compact and powerful indexes supporting fast string search are BWT indexes [48], i.e., indexes  
246 based on the Burrows-Wheeler Transform [49], sometimes also referred to as FM-indexes. Many highly optimized  
247 implementations were developed for read mapping (e.g., [45–47]); in our experiments we used the BWA index  
248 [46], following the widespread use and superior performance.

249

### Single pan-genome

250 We first evaluated the performance of  $k$ -mer presence/absence queries on a single pan-genome (**Table 1**, Methods).

251 We used the same *N. gonorrhoeae* draft genome assemblies as previously to build a gonococcal  $k$ -mer pan-genome  
252 for five different  $k$ -mer sizes using three strategies: by merging the draft assemblies, by computing comprehensible  
253 unitigs, and by computing comprehensive simplitigs (**Table 1a**). For all of them, we constructed BWT indexes  
254 using BWA [46], queried ten million  $k$ -mers using BWA fastmap [50], and evaluated the resulting memory footprint  
255 and query performance (**Table 1b**).

256

257 Consistent with the previous experiments, simplitigs provided a clear improvement over unitigs (**Table 1a**).

258 Maximal simplitigs improved  $3.0\times$ – $4.9\times$  the number of sequences and a  $1.5\times$ – $2.1\times$  the cumulative sequence  
259 lengths. Intuitively, the resulting memory footprint of BWA should be proportional to the cumulative sequence  
260 length, and therefore, the improvement in memory footprint was expected to be similar to the one of the cumulative  
261 sequence length. Surprisingly, the memory footprint improved substantially more ( $2.7\times$  –  $5.6\times$ ) (**Table 1b**). To  
262 explain this phenomenon, it is important to understand that the underlying full-text engine has to keep information

263 about individual sequences in memory as separate records and standard read mappers are optimized for low  
 264 numbers of references. As the number of reference sequences grows, it has a negative impact on both the memory  
 265 footprint and query speed. However, since simplitigs provided  $3.0\times$ – $4.9\times$  improvement in the number of sequences  
 266 over unitigs, it helped to alleviate this overhead. Overall, the comparatively high number of maximal unitigs  
 267 observed throughout our experiments (**Figures 1 and 2**) provides a further argument for using simplitigs as the  
 268 preferable representation of  $k$ -mer sets.

269

270

271 **Table 1.  $K$ -mer queries for the *N. gonorrhoeae* pan-genome. a)** Characteristics of the obtained unitigs and  
 272 simplitigs. **b)** Time and memory footprint of BWA for  $k$ -mer queries (10M  $k$ -mers).

| $k$ | Draft assemblies              |                         | Unitigs                       |                         | Simplitigs                    |                         |
|-----|-------------------------------|-------------------------|-------------------------------|-------------------------|-------------------------------|-------------------------|
|     | # sequences [ $\times 10^3$ ] | cumulative length [Mbp] | # sequences [ $\times 10^3$ ] | cumulative length [Mbp] | # sequences [ $\times 10^3$ ] | cumulative length [Mbp] |
| 15  | 79                            | 2,400                   | 440                           | 9.3                     | 90                            | 4.4                     |
| 19  |                               |                         | 190                           | 6.9                     | 60                            | 4.5                     |
| 23  |                               |                         | 180                           | 7.7                     | 59                            | 5.0                     |
| 27  |                               |                         | 180                           | 8.6                     | 59                            | 5.5                     |
| 31  |                               |                         | 180                           | 9.6                     | 60                            | 6.0                     |

273

274 **b)**

| $k$ | Draft assemblies |          | Unitigs    |          | Simplitigs |          |
|-----|------------------|----------|------------|----------|------------|----------|
|     | time [sec]       | mem [MB] | time [sec] | mem [MB] | time [sec] | mem [MB] |
| 15  | 34               | 3,600    | 42         | 78       | 24         | 14       |
| 19  | 50               |          | 35         | 37       | 28         | 12       |
| 23  | 66               |          | 41         | 37       | 32         | 13       |
| 27  | 81               |          | 48         | 38       | 37         | 14       |
| 31  | 97               |          | 56         | 40       | 42         | 14       |

275

276

## Multiple pan-genomes

277

Finally, we evaluated the performance of the simplitigs representation for simultaneous indexing of multiple

278

bacterial pan-genomes (**Table 2**, Methods). We downloaded all complete bacterial genomes from Genbank (as of

279

December 2019; 10,502 genomes out of which we managed to download 9,570; Methods). We restricted ourselves

280

to the complete genomes as the draft genomes in Genbank are known to be largely impacted by contamination

281

[51–53]. We grouped individual genomes per species which resulted in 719 bacterial pan-genomes. We then

282

computed simplitigs and unitigs for every species, merged the obtained representations, and calculated the same

283

statistics as previously (**Table 2a**); we performed this experiment for the  $k$ -mer lengths 18 and 31. Finally, we

284

constructed BWT indexes using BWA, and measured the resulting  $k$ -mer lookup performance using the same ten

285

million  $k$ -mers as in the previous section (**Table 2b**).

286

287

In this case, the number of sequences was reduced by a factor of  $4.2\times$  and  $3.1\times$  and the cumulative sequence length

288

by a factor of  $1.6\times$  and  $1.3\times$  for  $k = 18$  and  $k = 31$ , respectively (**Table 2a**). For  $k = 31$  simplitigs provided  $1.2\times$

289

speedup and  $1.8\times$  improvement in memory consumption (**Table 2b**); for  $k = 18$ , the speedup could not be

290

evaluated (Methods). These results are consistent with the previous sections and provide further evidence that

291

simplitigs are useful not only for storage, but also for fast  $k$ -mer lookup.



292 **Table 2. *K*-mer queries for multiple pan-genomes indexed simultaneously.** Bacterial pan-genomes were  
293 computed from the complete Genbank assemblies. **a)** Characteristics of the obtained unitigs and simplitigs. **b)** Time  
294 and memory footprint of BWA for *k*-mer queries (10 million *k*-mers).

295 **a)**

| <b>k</b> | <b>Unitigs</b>                          |                                          | <b>Simplitigs</b>                    |                                          |
|----------|-----------------------------------------|------------------------------------------|--------------------------------------|------------------------------------------|
|          | <b># sequences</b><br>[ $\times 10^6$ ] | <b>cumulative</b><br><b>length [Gbp]</b> | <b># sequences</b> [ $\times 10^6$ ] | <b>cumulative</b><br><b>length [Gbp]</b> |
| 18       | 250                                     | 9.0                                      | 59                                   | 5.7                                      |
| 31       | 110                                     | 8.6                                      | 36                                   | 6.4                                      |

296

297 **b)**

| <b>k</b> | <b>Unitigs</b>  |                 | <b>Simplitigs</b> |                 |
|----------|-----------------|-----------------|-------------------|-----------------|
|          | <b>time [s]</b> | <b>mem [GB]</b> | <b>time [s]</b>   | <b>mem [GB]</b> |
| 18       | NA              | 21              | 146               | 15              |
| 31       | 179             | 23              | 149               | 13              |

298

299

## Discussion

300 We introduced the concept of simplitigs, a generalization of unitigs, and demonstrated that simplitigs constitute a  
301 compact, efficient and scalable representation of de Bruijn graphs for commonly used genomic datasets. The two  
302 representations share many similarities. Both represent de Bruijn graphs in a lossless fashion, correspond to  
303 spelling of vertex-disjoint paths, and preserve  $k$ -mer sets. Being text-based and stored as FASTA files, both can be  
304 easily manipulated using standard Unix tools and indexed using full-text indexes. On the other hand, unlike unitigs,  
305 general simplitigs are not expected to have direct biological significance as neighboring segments of the same  
306 simplitig may correspond to distant parts of the same DNA molecule or even to different ones. Not all situations  
307 allow unitigs to be replaced by simplitigs, but where applicable, simplitigs show much better compression  
308 properties.

309

310 We provided ProphAsm, a tool implementing a greedy heuristic to compute maximal simplitigs from a  $k$ -mer set.  
311 This heuristic is easy to implement in any software, which suggests its further use as a generic method for  
312 serialization of  $k$ -mer sets. The simplicity is in contrast to the unitig model, where the complexity of the bi-directed  
313 de Bruijn graph model may complicate debugging; for instance, BCALM 2 does not support  $k$ -mer lengths that are  
314 divisible by four (as for December 2019; unsupported since 2017). As a downside, the naive implementation of the  
315 ProphAsm heuristic using a standard hashtable may run into memory issues. However, the memory consumption  
316 can be readily improved using more advanced data structures, similarly to what has been done for tools for unitig  
317 computation [39,54,55].

318

319 We note that ProphAsm is a spin-off of the ProPhyle software (<https://prophyle.github.io/>, [33]) for  
320 phylogeny-based metagenomic classification. Simplitig computation is an important component of ProPhyle [56],  
321 allowing efficient indexing of  $k$ -mers assigned to nodes of the phylogenetic tree. Independently of the present work,  
322 simplitigs were also recently studied in [57] under the name “spectrum-preserving strings”.

323

324 The data presented in this paper highlight the scaling of computational resources as more sequencing data become  
325 available [58]. The studied gonococcal dataset constitutes a relatively complete image of a bacterial population in a  
326 geographical region and at a given time scale. As such, it can be used to model the “state of completion” of  $k$ -mer  
327 pan-genomes. On the other hand, the multiple pan-genomes experiment provided insights about the resulting  
328 performance when a large number of pan-genomes is queried simultaneously using a BWT index. This allows us to  
329 make predictions about the scaling for species where at present only a limited number of assemblies are available,  
330 but more data are likely to be generated in the future. Overall, with more data available, the comparative benefits of  
331 simplitigs over unitigs grow.

332

333 Besides the presented advantages, simplitigs also introduce several technical challenges related to the ambiguity (as  
334 illustrated in **Figure 1**). Whereas maximal unitigs are uniquely defined (up to the order and reverse  
335 complementing), this is not the case for maximal simplitigs. In the presented heuristic, the resulting maximal  
336 simplitigs and their characteristics depend on the order in which the initial  $k$ -mers are drawn from the underlying  
337 set. At every iteration, once a maximal simplitig is built, a new  $k$ -mer is drawn from the graph as the new initial  
338  $k$ -mer. In the case of ProphAsm, this is an unordered set from the C++ standard library, which makes it difficult to  
339 implement reproducibly across platforms.

340

341 Modern bioinformatics applications of de Bruijn graphs often require multiple graphs considered simultaneously.  
342 The resulting structure is usually referred to as a colored de Bruijn graph [25] and its representations have been  
343 widely studied ([59–70]). Even though we touched upon this setting in the section Multiple pan-genomes,  
344 exploiting the similarity between individual de Bruijn graphs for further compression in simplitig-based approaches  
345 is to be addressed in future work.

346

347 With the growing interest in  $k$ -mer indexing of all genomic datasets [69], we anticipate the simplitig representation  
348 to be valuable as a generic compact representation of de Bruijn graphs.

349

## Methods

350

### De Bruijn graphs

351

All strings are assumed to be over the alphabet  $\{A, C, G, T\}$ . A  $k$ -mer is a string of length  $k$ . For a string

352

$s = s_1 \dots s_n$ , we define  $pref_k(s) = s_1 \dots s_k$  and  $suf_k(s) = s_{n-k+1} \dots s_n$ . For two strings  $s$  and  $t$  of length at least  $k$ , we

353

define the binary connectivity relation  $s \rightarrow_k t$  if and only if  $pref_k(s) = suf_k(t)$ . Given a set  $K$  of  $k$ -mers, the *de*

354

*Bruijn graph* of  $K$  is the directed graph  $G = (V, E)$  with  $V = K$  and  $E = \{(u, v) \mid u \rightarrow_{k-1} v\}$ . This definition of *de*

355

Bruijn graphs is *node-centric*, as nodes are identified with  $k$ -mers and edges are implicit. Therefore, we can use the

356

terms “ $k$ -mer set” and “*de Bruijn graph*” interchangeably.

357

### Simplitigs

358

Consider a set  $K$  of  $k$ -mers and the corresponding *de Bruijn graph*  $G = (V, E)$ . A *simplitig graph*  $G' = (V, E')$  is

359

a spanning subgraph of  $G$  that is acyclic and the in-degree and out-degree of any node is at most one. It follows

360

from this definition that a simplitig graph is a vertex-disjoint union of paths called *simplitigs*. A simplitig is called

361

*maximal* if it cannot be extended forward or backward without breaking the definition of simplitig graph. In more

362

detail, a simplitig  $u_1 \rightarrow_{k-1} u_2 \rightarrow_{k-1} \dots \rightarrow_{k-1} u_n$  is maximal if the following conditions hold

363

- either  $u_1$  has no incoming edges in  $G$ , or for any edge  $(v, u_1) \in E$ ,  $v$  belongs to another simplitig and it

364

is not its last vertex,

365

- either  $u_n$  has no outgoing edges in  $G$ , or for any edge  $(u_n, v) \in E$ ,  $v$  belongs to another simplitig and it is

366

not its first vertex.

367

A *unitig* is a simplitig  $u_1 \rightarrow_{k-1} u_2 \rightarrow_{k-1} \dots \rightarrow_{k-1} u_n$  such that each of the nodes  $u_2, \dots, u_n$  has in-degree 1 in graph  $G$ . A

368

*maximal unitig* is defined similarly.

369

## Greedy computation of simplitigs

370 The problem of computing maximal simplitigs that are optimal in the cumulative sequence length corresponds to  
371 the vertex-disjoint path cover problem, which is known to be NP-hard in the general case [71] but the complexity is  
372 unknown for de Bruijn graphs. Throughout this paper, a greedy approach was used for the computation of  
373 simplitigs (**Algorithm 1**). Simplitigs were constructed iteratively, starting from an arbitrary  $k$ -mer and being  
374 extended greedily forwards and backwards as long as possible. Note that **Algorithm 1** works in the bi-directed  
375 setting, in which canonical  $k$ -mers are used instead of “standard”  $k$ -mers. A formal definition of bi-directed de  
376 Bruijn graphs requires complex formalism (see, e.g.,  
377 <https://github.com/GATB/bcalm/tree/master/bidirected-graphs-in-bcalm2>). Since the greedy heuristic works  
378 similarly in both setups and does not require the extended formalism, we resorted to the uni-directed model for the  
379 explanation of the concepts.

380

## Comparing simplitigs with unitigs

381 We compare simplitigs and unitigs in terms of the number of sequences produced and their cumulative length. Note  
382 that these numbers are related: assuming that the frequency of every  $k$ -mer is 1, then

$$383 \quad cum\_seq\_len = \#kmers + (k - 1) \#seqs \quad (\text{eq 1})$$

384 Finding the optimal solutions can be highly expensive computationally. However, we can easily provide the lower  
385 bound  $\#kmers + k - 1$ , corresponding to the maximum possible degree of compactification (i.e., a single  
386 simplitig covering all  $k$ -mers). In the situations where cumulative sequence length of simplitigs approaches this  
387 bound, the greedy heuristic presented above is sufficient.

388

## Correctness evaluation

389 The correctness of simplitigs can be verified using an arbitrary  $k$ -mer counter. Simplitigs are correct if and only if  
390 every  $k$ -mer is present exactly once and the number of distinct  $k$ -mers is the same as in the original datasets. To  
391 verify the correctness of ProphAsm outputs, we used JellyFish 2 [12].

392

## Experimental evaluation – model organisms

393 Reference sequences for six selected model organisms were downloaded from RefSeq: *S. pneumoniae* str. ATCC  
394 700669 (accession: NC\_011900.1, length 2.22 Mbp), *Escherichia coli* str. K-12 (accession: NC\_000913.3, length:  
395 4.64 Mbp), *Saccharomyces cerevisiae* (accession: NC\_001133.9, length: 12.2 Mbp), *Caenorhabditis elegans*  
396 (accession: GCF\_000002985.6, length: 100 Mbp), *Bombyx mori* (accession: GCF\_000151625.1, length: 482 Mbp),  
397 and *Homo sapiens* (HG38, <http://hgdownload.soe.ucsc.edu/goldenPath/hg38/bigZips/hg38.fa.gz>, length: 3.21 Gbp).  
398 For each of them, simplitigs and unitigs were computed using ProphAsm and BCALM 2, respectively, for the range  
399 of  $k$ -mer sizes [11,31]. As the BCALM 2 algorithm does not support  $k$ -mer sizes that are multiples of 4, the  
400 corresponding experiments had been excluded from the evaluation. When applied to HG38, both programs also  
401 experienced in a single case of an integer overflow error: BCALM 2 and ProphAsm failed with  $k = 31$  and  
402  $k = 16$ , respectively.

403

## Experimental evaluation – pan-genomic scaling

404 First, 1,102 draft assemblies of *N. gonorrhoeae* clinical isolates (collected from 2000 to 2013 by the Centers for  
405 Disease Control and Prevention’s Gonococcal Isolate Surveillance Project [42], and sequenced using Illumina  
406 HiSeq) were downloaded from Zenodo [72]. Second, 616 draft assemblies of *S. pneumoniae* isolates (collected  
407 from 2001 to 2007 for a carriage study of children in Massachusetts, USA [43,44], and sequenced using Illumina  
408 HiSeq) were downloaded from the SRA FTP server using the accession codes provided in Table 1 in [44]. For each  
409 of these datasets, an increasing number of genomes was being taken, merged and simplitigs and unitigs computed  
410 using ProphAsm and BCALM 2, respectively. This experiment was performed for  $k = 18$  and  $k = 31$ . To avoid  
411 excessive resource usage the functions were evaluated at points in an increasing distance (for intervals [10, 100]  
412 and  $[100, +\infty]$  only multiples of 5 and 20 were evaluated, respectively).

413

## Experimental evaluation – fulltext $k$ -mer queries

414

In the single pan-genome experiment, the same 1,102 assemblies of *N. gonorrhoeae* were merged into a single file.

415

ProphAsm and BCALM 2 were then used to compute simplitigs and unitigs from this file for

416

$k = 15, 19, 23, 27, 31$ . All three obtained FASTA files (assemblies, simplitigs, and unitigs) were used to construct

417

a BWA index, which was then queried for  $k$ -mers using ‘bwa fastmap -l {kmer-size}’. The  $k$ -mers were previously

418

generated from the same pan-genome using DWGsim [73] (version 0.1.11, with the parameters ‘-z 0 -l {kmer-size}

419

-2 0 -N 10000000’).

420

421

For the multiple pan-genome experiment, a list of available bacterial assemblies was downloaded from

422

[ftp://ftp.ncbi.nlm.nih.gov/genomes/genbank/bacteria/assembly\\_summary.txt](ftp://ftp.ncbi.nlm.nih.gov/genomes/genbank/bacteria/assembly_summary.txt). For all assemblies marked as

423

complete, accessions were extracted and used for their download using RSync (files matching

424

‘\*v\*\_genomic.fna.gz’). The assemblies were then merged and the obtained master file then used for computing

425

simplitigs and unitigs using ProphAsm and BCALM 2. The obtained simplitig and unitig files were used to

426

construct a BWA index and queried for the same  $k$ -mers as in the previous section using ‘bwa fastmap -l

427

{kmer-size}’. The times of loading the indexes into memory were measured separately and subtracted from the

428

query times. With unitigs for  $k = 18$ , bwa repeatedly crashed in the middle of  $k$ -mer matching for an unspecified

429

reason.

430

## Computational setup

431

The model organism experiment was performed on the HMS O2 research high-performance cluster on nodes with

432

120 GB RAM. All other experiments were performed on an iMac 4.2 GHz Quad-Core Intel Core i7 with 40 GB

433

RAM and an SSD disk. The reproducibility of computation was ensured using BioConda [74]. All benchmarking

434

was performed using ProphAsm v0.1.0 and BCALM 2 v2.2.1 (commit e8ac60252fa). Times and memory footprint

435

were measured using GNU time.



436

## Implementation and availability

437 ProphAsm is written in C++ and available under the MIT license from <http://github.com/prophyle/prophasm>. The  
438 software package is also available from BioConda [74].

439

## Acknowledgements

440 The authors thank Jasmijn Baaijens for careful reading and valuable comments. This work was supported by the  
441 David and Lucile Packard Foundation. Portions of this research were conducted on the O2 high-performance  
442 compute clusters, supported by the Research Computing Groups at Harvard Medical School.

443

## References

- 444 1. Needleman SB, Wunsch CD. A general method applicable to the search for similarities in the amino acid  
445 sequence of two proteins. *J Mol Biol.* 1970;48: 443–453. doi:10.1016/0022-2836(70)90057-4
- 446 2. Smith TF, Waterman MS. Identification of common molecular subsequences. *J Mol Biol.* 1981;147: 195–197.  
447 doi:10.1016/0022-2836(81)90087-5
- 448 3. Gotoh O. An improved algorithm for matching biological sequences. *J Mol Biol.* 1982;162: 705–708.  
449 doi:10.1016/0022-2836(82)90398-9
- 450 4. Petit RA, Read TD. *Staphylococcus aureus* viewed from the perspective of 40,000+ genomes. *PeerJ.* 2018;6:  
451 e5261. doi:10.7717/peerj.5261
- 452 5. Gladstone RA, Lo SW, Lees JA, Croucher NJ, van Tonder AJ, Corander J, et al. International genomic  
453 definition of pneumococcal lineages, to contextualise disease, antibiotic resistance and vaccine impact.  
454 *EBioMedicine.* 2019;43: 338–346. doi:10.1016/j.ebiom.2019.04.021
- 455 6. Zhou Z, Alikhan N-F, Mohamed K, Fan Y, Achtman M, the Agama Study Group. The EnteroBase user’s  
456 guide, with case studies on *Salmonella* transmissions, *Yersinia pestis* phylogeny, and *Escherichia* core genomic  
457 diversity. *Genome Research.* 2020. pp. 138–152. doi:10.1101/gr.251678.119
- 458 7. Treangen TJ, Salzberg SL. Repetitive DNA and next-generation sequencing: computational challenges and  
459 solutions. *Nat Rev Genet.* 2011;13: 36–46. doi:10.1038/nrg3117
- 460 8. Salzberg SL, Phillippy AM, Zimin A, Puiu D, Magoc T, Koren S, et al. GAGE: A critical evaluation of  
461 genome assemblies and assembly algorithms. *Genome Res.* 2012;22: 557–567. doi:10.1101/gr.131383.111
- 462 9. Bradnam KR, Fass JN, Alexandrov A, Baranay P, Bechner M, Birol I, et al. Assemblathon 2: evaluating de  
463 novo methods of genome assembly in three vertebrate species. *Gigascience.* 2013;2: 10.  
464 doi:10.1186/2047-217X-2-10
- 465 10. Alhakami H, Mirebrahim H, Lonardi S. A comparative evaluation of genome assembly reconciliation tools.  
466 *Genome Biol.* 2017;18: 93. doi:10.1186/s13059-017-1213-3
- 467 11. Chikhi R, Holub J, Medvedev P. Data structures to represent sets of k-long DNA sequences. 2019; 1–16.  
468 Available: <http://arxiv.org/abs/1903.12312>
- 469 12. Marçais G, Kingsford C. A fast, lock-free approach for efficient parallel counting of occurrences of k-mers.  
470 *Bioinformatics.* 2011;27: 764–770. doi:10.1093/bioinformatics/btr011
- 471 13. Deorowicz S, Debudaj-Grabysz A, Grabowski S. Disk-based k-mer counting on a PC. *BMC Bioinformatics.*  
472 2013;14: 160. doi:10.1186/1471-2105-14-160
- 473 14. Rizk G, Lavenier D, Chikhi R. DSK: k-mer counting with very low memory usage. *Bioinformatics.* 2013;29:  
474 652–653. doi:10.1093/bioinformatics/btt020
- 475 15. Crusoe MR, Alameldin HF, Awad S, Boucher E, Caldwell A, Cartwright R, et al. The khmer software  
476 package: enabling efficient nucleotide sequence analysis. *F1000Res.* 2015; 1–12.

- 477        doi:10.12688/f1000research.6924.1
- 478    16. Idury RM, Waterman MS. A New Algorithm for DNA Sequence Assembly. *J Comput Biol.* 1995;2: 291–306.  
479        doi:10.1089/cmb.1995.2.291
- 480    17. Pevzner PA. 1-Tuple DNA Sequencing: Computer Analysis. *J Biomol Struct Dyn.* 1989;7: 63–73.  
481        doi:10.1080/07391102.1989.10507752
- 482    18. Pevzner PA, Tang H, Waterman MS. An Eulerian path approach to DNA fragment assembly. *Proceedings of  
483        the National Academy of Sciences.* 2001;98: 9748–9753. doi:10.1073/pnas.171285098
- 484    19. Bankevich A, Nurk S, Antipov D, Gurevich A a., Dvorkin M, Kulikov AS, et al. SPAdes: A New Genome  
485        Assembly Algorithm and Its Applications to Single-Cell Sequencing. *J Comput Biol.* 2012;19: 455–477.  
486        doi:10.1089/cmb.2012.0021
- 487    20. Simpson JT, Wong K, Jackman SD, Schein JE, Jones SJM. ABySS: A parallel assembler for short read  
488        sequence data. 2009; 1117–1123. doi:10.1101/gr.089532.108.
- 489    21. Zerbino DR, Birney E. Velvet: algorithms for de novo short read assembly using de Bruijn graphs. *Genome  
490        Res.* 2008;18: 821–829. doi:10.1101/gr.074492.107
- 491    22. Chikhi R, Rizk G. Space-efficient and exact de Bruijn graph representation based on a Bloom filter.  
492        *Algorithms Mol Biol.* 2013;8: 22. doi:10.1186/1748-7188-8-22
- 493    23. Li D, Liu C-M, Luo R, Sadakane K, Lam T-W. MEGAHIT: an ultra-fast single-node solution for large and  
494        complex metagenomics assembly via succinct de Bruijn graph. *Bioinformatics.* 2015;31: 1674–1676.  
495        doi:10.1093/bioinformatics/btv033
- 496    24. Zieleszinski A, Vinga S, Almeida J, Karlowski WM. Alignment-free sequence comparison: benefits,  
497        applications, and tools. *Genome Biol.* 2017;18: 186. doi:10.1186/s13059-017-1319-7
- 498    25. Iqbal Z, Caccamo M, Turner I, Flicek P, McVean G. De novo assembly and genotyping of variants using  
499        colored de Bruijn graphs. *Nat Genet.* 2012;44: 226–232. doi:10.1038/ng.1028
- 500    26. Bradley P, Gordon NC, Walker TM, Dunn L, Heys S, Huang B, et al. Rapid antibiotic-resistance predictions  
501        from genome sequence data for *Staphylococcus aureus* and *Mycobacterium tuberculosis*. *Nat Commun.*  
502        2015;6: 10063. doi:10.1038/ncomms10063
- 503    27. Shajii AR, Yorukoglu D, William Yu Y, Berger B, Yu YW, Berger B. Fast genotyping of known SNPs through  
504        approximate k-mer matching. *Bioinformatics.* 2016;32: i538–i544. doi:10.1093/bioinformatics/btw460
- 505    28. Sun C, Medvedev P. Toward fast and accurate SNP genotyping from whole genome sequencing data for  
506        bedside diagnostics. *Bioinformatics.* 2019;35: 415–420. doi:10.1093/bioinformatics/bty641
- 507    29. Nordström KJV, Albani MC, James GV, Gutjahr C, Hartwig B, Turck F, et al. Mutation identification by direct  
508        comparison of whole-genome sequencing data from mutant and wild-type individuals using k-mers. *Nat  
509        Biotechnol.* 2013;31: 325–330. doi:10.1038/nbt.2515
- 510    30. Bray NL, Pimentel H, Melsted P, Pachter L. Near-optimal probabilistic RNA-seq quantification. *Nat  
511        Biotechnol.* 2016;34: 525–527. doi:10.1038/nbt.3519
- 512    31. Wood DE, Salzberg SL. Kraken: ultrafast metagenomic sequence classification using exact alignments.

- 513 Genome Biol. 2014;15: R46. doi:10.1186/gb-2014-15-3-r46
- 514 32. Ames SK, Hysom DA, Gardner SN, Lloyd GS, Gokhale MB, Allen JE. Scalable metagenomic taxonomy  
515 classification using a reference genome database. *Bioinformatics*. 2013;29: 2253–2260.  
516 doi:10.1093/bioinformatics/btt389
- 517 33. Břinda K, Salikhov K, Pignotti S, Kucherov G. ProPhyle: An accurate, resource-frugal and deterministic DNA  
518 sequence classifier. *Zenodo*; 2017. doi:10.5281/zenodo.1045429
- 519 34. Corvelo A, Clarke WE, Robine N, Zody MC. taxMaps: comprehensive and highly accurate taxonomic  
520 classification of short-read data in reasonable time. *Genome Res*. 2018;28: 751–758.  
521 doi:10.1101/gr.225276.117
- 522 35. Ye SH, Siddle KJ, Park DJ, Sabeti PC. Benchmarking Metagenomics Tools for Taxonomic Classification.  
523 *Cell*. 2019;178: 779–794. doi:10.1016/j.cell.2019.07.010
- 524 36. Sirén J. Indexing Variation Graphs. 2017 Proceedings of the Ninteenth Workshop on Algorithm Engineering  
525 and Experiments (ALENEX). Philadelphia, PA: Society for Industrial and Applied Mathematics; 2017. pp.  
526 13–27. doi:10.1137/1.9781611974768.2
- 527 37. Garrison E, Sirén J, Novak AM, Hickey G, Eizenga JM, Dawson ET, et al. Variation graph toolkit improves  
528 read mapping by representing genetic variation in the reference. *Nat Biotechnol*. 2018;36: 875–881.  
529 doi:10.1038/nbt.4227
- 530 38. Chikhi R, Limasset A, Jackman S, Simpson JT, Medvedev P. On the Representation of De Bruijn Graphs. *J*  
531 *Comput Biol*. 2015;22: 336–352. doi:10.1089/cmb.2014.0160
- 532 39. Chikhi R, Limasset A, Medvedev P. Compacting de Bruijn graphs from sequencing data quickly and in low  
533 memory. *Bioinformatics*. 2016;32: i201–i208. doi:10.1093/bioinformatics/btw279
- 534 40. Břinda K, Callendrello A, Ma KC, MacFadden DR, Charalampous T, Lee RS, et al. Rapid inference of  
535 antibiotic resistance and susceptibility by genomic neighbour typing. *Nature Microbiology*. 2020.  
536 doi:10.1038/s41564-019-0656-6
- 537 41. Marschall T, Marz M, Abeel T, Dijkstra L, Dutilh BE, Ghaffaari A, et al. Computational pan-genomics: status,  
538 promises and challenges. *Brief Bioinform*. 2016; bbw089. doi:10.1093/bib/bbw089
- 539 42. Grad YH, Harris SR, Kirkcaldy RD, Green AG, Marks DS, Bentley SD, et al. Genomic Epidemiology of  
540 Gonococcal Resistance to Extended-Spectrum Cephalosporins, Macrolides, and Fluoroquinolones in the  
541 United States, 2000–2013. *J Infect Dis*. 2016;214: 1579–1587. doi:10.1093/infdis/jiw420
- 542 43. Croucher NJ, Finkelstein JA, Pelton SI, Mitchell PK, Lee GM, Parkhill J, et al. Population genomics of  
543 post-vaccine changes in pneumococcal epidemiology. *Nat Genet*. 2013;45: 656–663. doi:10.1038/ng.2625
- 544 44. Croucher NJ, Finkelstein JA, Pelton SI, Parkhill J, Bentley SD, Lipsitch M, et al. Population genomic datasets  
545 describing the post-vaccine evolutionary epidemiology of *Streptococcus pneumoniae*. *Scientific data*. 2015;2:  
546 150058. doi:10.1038/sdata.2015.58
- 547 45. Langmead B, Trapnell C, Pop M, Salzberg SL. Ultrafast and memory-efficient alignment of short DNA  
548 sequences to the human genome. *Genome Biol*. 2009;10: R25. doi:10.1186/gb-2009-10-3-r25
- 549 46. Li H, Durbin R. Fast and accurate short read alignment with Burrows–Wheeler transform. *Bioinformatics*.

- 550 2009;25: 1754–1760. doi:10.1093/bioinformatics/btp324
- 551 47. Li R, Yu C, Li Y, Lam T-W, Yiu S-M, Kristiansen K, et al. SOAP2: an improved ultrafast tool for short read  
552 alignment. *Bioinformatics*. 2009;25: 1966–1967. doi:10.1093/bioinformatics/btp336
- 553 48. Ferragina P, Manzini G. Opportunistic data structures with applications. *Proceedings 41st Annual Symposium*  
554 *on Foundations of Computer Science*. IEEE Comput. Soc; 2000. pp. 390–398. doi:10.1109/SFCS.2000.892127
- 555 49. Burrows M, Wheeler DJ. *A Block-sorting Lossless Data Compression Algorithm*. 1994.
- 556 50. Li H. Exploring single-sample SNP and INDEL calling with whole-genome de novo assembly.  
557 *Bioinformatics*. 2012;28: 1838–1844. doi:10.1093/bioinformatics/bts280
- 558 51. Merchant S, Wood DE, Salzberg SL. Unexpected cross-species contamination in genome sequencing projects.  
559 *PeerJ*. 2014;2: e675. doi:10.7717/peerj.675
- 560 52. Lu J, Salzberg SL. Removing contaminants from databases of draft genomes. *PLoS Comput Biol*. 2018;14:  
561 e1006277. doi:10.1371/journal.pcbi.1006277
- 562 53. Steinegger M, Salzberg SL. Terminating contamination: large-scale search identifies more than 2,000,000  
563 contaminated entries in GenBank. *bioRxiv*. 2020. p. 2020.01.26.920173. doi:10.1101/2020.01.26.920173
- 564 54. Guo H, Fu Y, Gao Y, Li J, Wang Y, Liu B. deGSM: memory scalable construction of large scale de Bruijn  
565 Graph. *IEEE/ACM Trans Comput Biol Bioinform*. 2019; 1–1. doi:10.1109/TCBB.2019.2913932
- 566 55. Pan T, Nihalani R, Aluru S. Fast de Bruijn Graph Compaction in Distributed Memory Environments.  
567 *IEEE/ACM Trans Comput Biol Bioinform*. 2018; 1–1. doi:10.1109/TCBB.2018.2858797
- 568 56. Břinda K. Novel computational techniques for mapping and classifying Next-Generation Sequencing data.  
569 PhD Thesis, Université Paris-Est. 2016.
- 570 57. Rahman A, Medvedev P. Representation of k-mer sets using spectrum-preserving string sets. *bioRxiv*. 2020. p.  
571 2020.01.07.896928. doi:10.1101/2020.01.07.896928
- 572 58. Nasko DJ, Koren S, Phillippy AM, Treangen TJ. RefSeq database growth influences the accuracy of  
573 k-mer-based lowest common ancestor species identification. *Genome Biol*. 2018;19: 165.  
574 doi:10.1186/s13059-018-1554-6
- 575 59. Bowe A, Onodera T, Sadakane K, Shibuya T. Succinct de Bruijn Graphs. 2012. pp. 225–235.  
576 doi:10.1007/978-3-642-33122-0\_18
- 577 60. Holley G, Wittler R, Stoye J. Bloom Filter Trie: an alignment-free and reference-free data structure for  
578 pan-genome storage. *Algorithms Mol Biol*. 2016;11: 3. doi:10.1186/s13015-016-0066-8
- 579 61. Solomon B, Kingsford C. Fast search of thousands of short-read sequencing experiments. *Nat Biotechnol*.  
580 2016;34: 300–302. doi:10.1038/nbt.3442
- 581 62. Muggli MD, Bowe A, Noyes NR, Morley PS, Belk KE, Raymond R, et al. Succinct colored de Bruijn graphs.  
582 *Bioinformatics*. 2017;33: 3181–3187. doi:10.1093/bioinformatics/btx067
- 583 63. Sun C, Harris RS, Chikhi R, Medvedev P. AllSome Sequence Bloom Trees. *J Comput Biol*. 2018;25: 467–479.  
584 doi:10.1089/cmb.2017.0258

- 585 64. Pandey P, Almodaresi F, Bender MA, Ferdman M, Johnson R, Patro R. Mantis: A Fast, Small, and Exact  
586 Large-Scale Sequence-Search Index. *Cell Syst.* 2018;7: 201–207.e4. doi:10.1016/j.cels.2018.05.021
- 587 65. Yu Y, Liu J, Liu X, Zhang Y, Magner E, Lehnert E, et al. SeqOthello: querying RNA-seq experiments at scale.  
588 *Genome Biol.* 2018;19: 167. doi:10.1186/s13059-018-1535-9
- 589 66. Almodaresi F, Sarkar H, Srivastava A, Patro R. A space and time-efficient index for the compacted colored de  
590 Bruijn graph. *Bioinformatics.* 2018. pp. i169–i177. doi:10.1093/bioinformatics/bty292
- 591 67. Harris RS, Medvedev P. Improved representation of sequence Bloom trees. *Bioinformatics.* 2019.  
592 doi:10.1093/bioinformatics/btz662
- 593 68. Holley G, Melsted P. Bifrost – Highly parallel construction and indexing of colored and compacted de Bruijn  
594 graphs. *bioRxiv.* 2019; 1–19. doi:10.1101/695338
- 595 69. Bradley P, den Bakker HC, Rocha EPC, McVean G, Iqbal Z. Ultrafast search of all deposited bacterial and  
596 viral genomic data. *Nat Biotechnol.* 2019;37: 152–159. doi:10.1038/s41587-018-0010-1
- 597 70. Bingmann T, Bradley P, Gauger F, Iqbal Z. COBS: a Compact Bit-Sliced Signature Index. *arXiv [cs.DB].*  
598 2019. Available: <http://arxiv.org/abs/1905.09624>
- 599 71. Manuel P. Revisiting path-type covering and partitioning problems. *arXiv [math.CO].* 2018. Available:  
600 <http://arxiv.org/abs/1807.10613>
- 601 72. Grad Y. Data for “Genomic Epidemiology of Gonococcal Resistance to Extended-Spectrum Cephalosporins,  
602 Macrolides, and Fluoroquinolones in the United States, 2000-2013.” *Zenodo*; 2019.  
603 doi:10.5281/ZENODO.2618836
- 604 73. Homer N. DWGSIM: Whole Genome Simulator for Next-Generation Sequencing. *GitHub repository.* 2010.
- 605 74. Grünig B, Dale R, Sjödin A, Chapman BA, Rowe J, Tomkins-Tinch CH, et al. Bioconda: sustainable and  
606 comprehensive software distribution for the life sciences. *Nat Methods.* 2018;15: 475–476.  
607 doi:10.1038/s41592-018-0046-7
- 608
